# Supplementary material
Source: MDPI journal article supplement (https://www.mdpi.com/2076-3263/8/10/381)
Supplement: s1 [file s1]

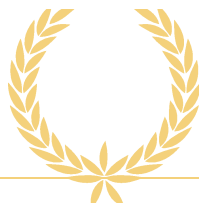

We certify that the following article

**Geomorphological, Landscape and Cultural Heritage of “Serra do Alvão”:  
Interpretation, Assessment and Threats**

Bruno Martins \*, Andreia Pereira

has undergone English language editing by MDPI. The text has been checked for correct use of grammar and common technical terms, and edited to a level suitable for reporting research in a scholarly journal.

MDPI uses experienced, native English speaking editors. Full details of the editing service can be found at

► [www.mdpi.com/authors/english](http://www.mdpi.com/authors/english).

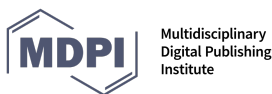

Basel, July 2018

Martyn Rittman, Ph.D.  
English Editing Manager  
[englishediting@mdpi.com](mailto:englishediting@mdpi.com)  
<http://www.mdpi.com/authors/english>
